# Supplementary material for: Heterologous Expression of Immature Forms of Human Islet Amyloid Polypeptide in Yeast Triggers Intracellular Aggregation and Cytotoxicity
Source: PubMed Central journal article supplement (PMC7496629; doi:10.3389/fmicb.2020.02035), 2020-09-03
Supplement: Data_Sheet_1.pdf [file Data_Sheet_1.pdf]

# Table S1

**Table S1:** Plasmids used in this study

| Plasmid           | Description                                          | Source or Reference           |
|-------------------|------------------------------------------------------|-------------------------------|
| p426-Gal-aSyn-GFP | GAL1 <sub>promoter</sub> -aSyn.GFP, 2 $\mu$ , URA    | (Outeiro and Lindquist, 2003) |
| p426*             | GAL1 <sub>promoter</sub> , 2 $\mu$ , URA             | ATCC® 87341™ **               |
| p426-GFP          | GAL1 <sub>promoter</sub> -GFP, 2 $\mu$ , URA         | This study                    |
| p426-SP-GFP       | GAL1 <sub>promoter</sub> -SP-GFP, 2 $\mu$ , URA      | This study                    |
| p426-ppiAPP-GFP   | GAL1 <sub>promoter</sub> -ppiAPP.GFP, 2 $\mu$ , URA  | This study                    |
| p426-piAPP-GFP    | GAL1 <sub>promoter</sub> -piAPP.GFP, 2 $\mu$ , URA   | This study                    |
| p426-matiAPP-GFP  | GAL1 <sub>promoter</sub> -matiAPP.GFP, 2 $\mu$ , URA | This study                    |

\* Empty plasmid used as controls, \*\* American Type Culture Collection

## Table S2

**Table S2:** Antibodies used in this study

| Antibody                                         | Source                      | Identifier     | Dilution |
|--------------------------------------------------|-----------------------------|----------------|----------|
| Rabbit anti-IAPP polyclonal                      | Sigma-Aldrich (USA)         | Cat# HPA053194 | 1:2500   |
| Mouse anti-GFP                                   | NeuroMabs (California, USA) | Cat# 75-131    | 1:5000   |
| Mouse anti-Pgk1 monoclonal                       | Invitrogen (USA)            | Cat# 459250    | 1:1000   |
| Goat anti-mouse polyclonal peroxidase-conjugated | Sigma-Aldrich (USA)         | Cat# A5278     | 1:10000  |
| Stabilized goat anti-rabbit HRP-conjugated       | Pierce (USA)                | Cat# 1858415   | 1:5000   |

# Figure S1

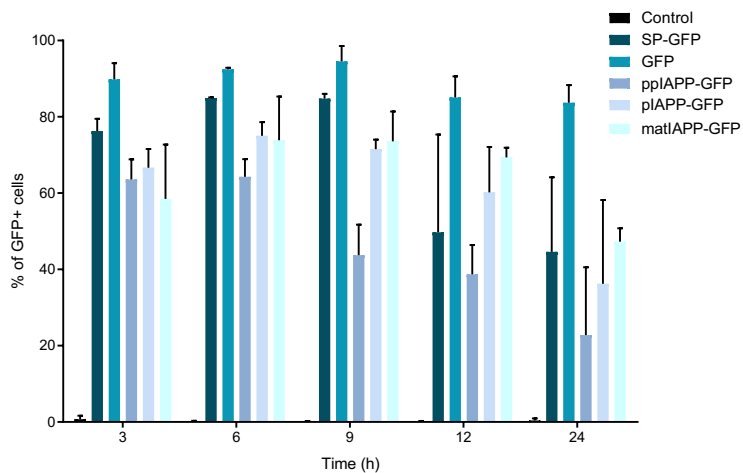

**Figure S1: (A)** BY4741 cells expressing IAPP-GFP fusions and the respective controls were induced with galactose for the indicated time points and the frequency of GFP cells was assessed by flow cytometry.

# Figure S2

**A**

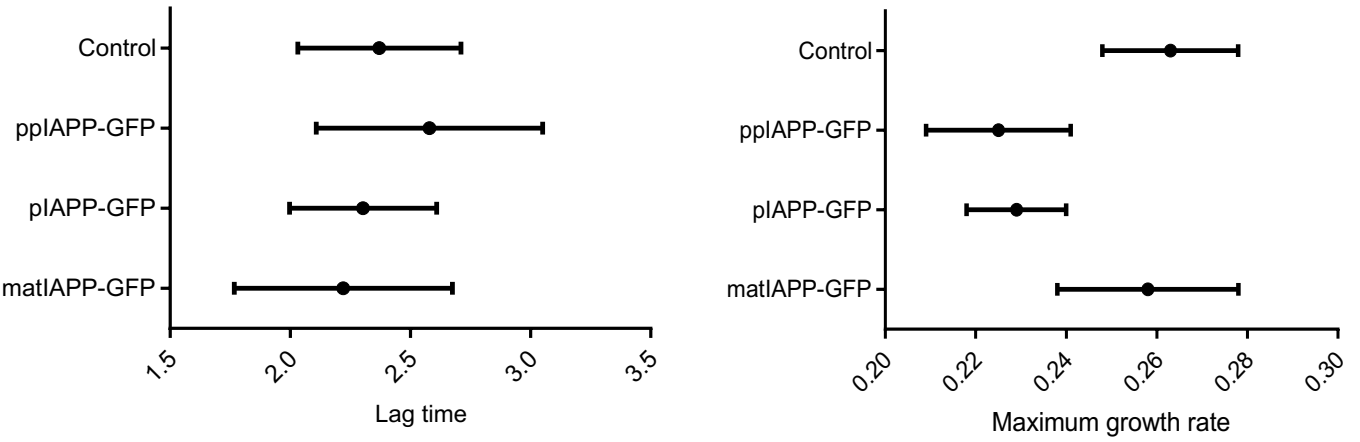

**B**

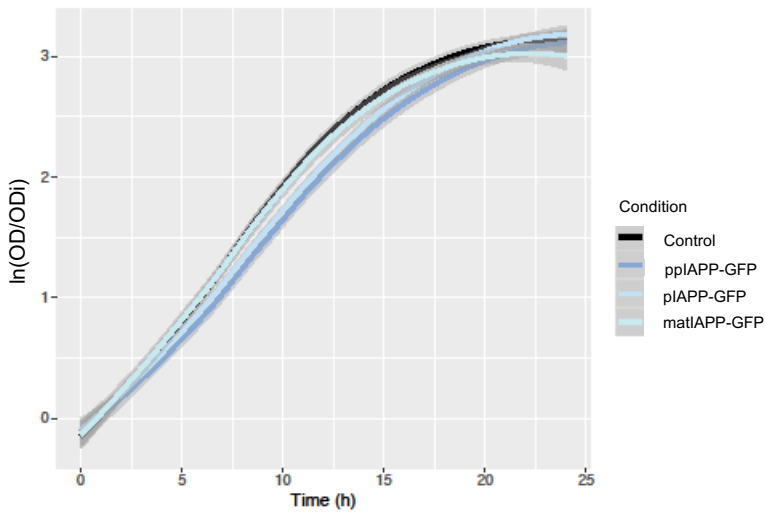

**Figure S2: (A)** BY4741 cells expressing IAPP-GFP fusions and the control construct were induced with galactose and  $OD_{600}$  was monitored hourly. The indicated growth parameters were calculated using the R software. **(B)** Representation of the growth curves of all the strains.

## Figure S3

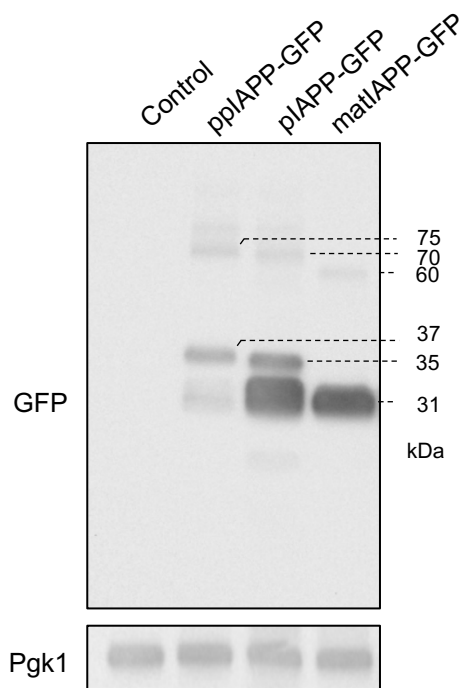

**Figure S3:** BY4741 cells expressing IAPP-GFP fusions and the control construct were induced with galactose for 12 h and proteins were assessed by immunoblotting using anti-GFP antibody. Pgk1 was used as loading control.

## Figure S4

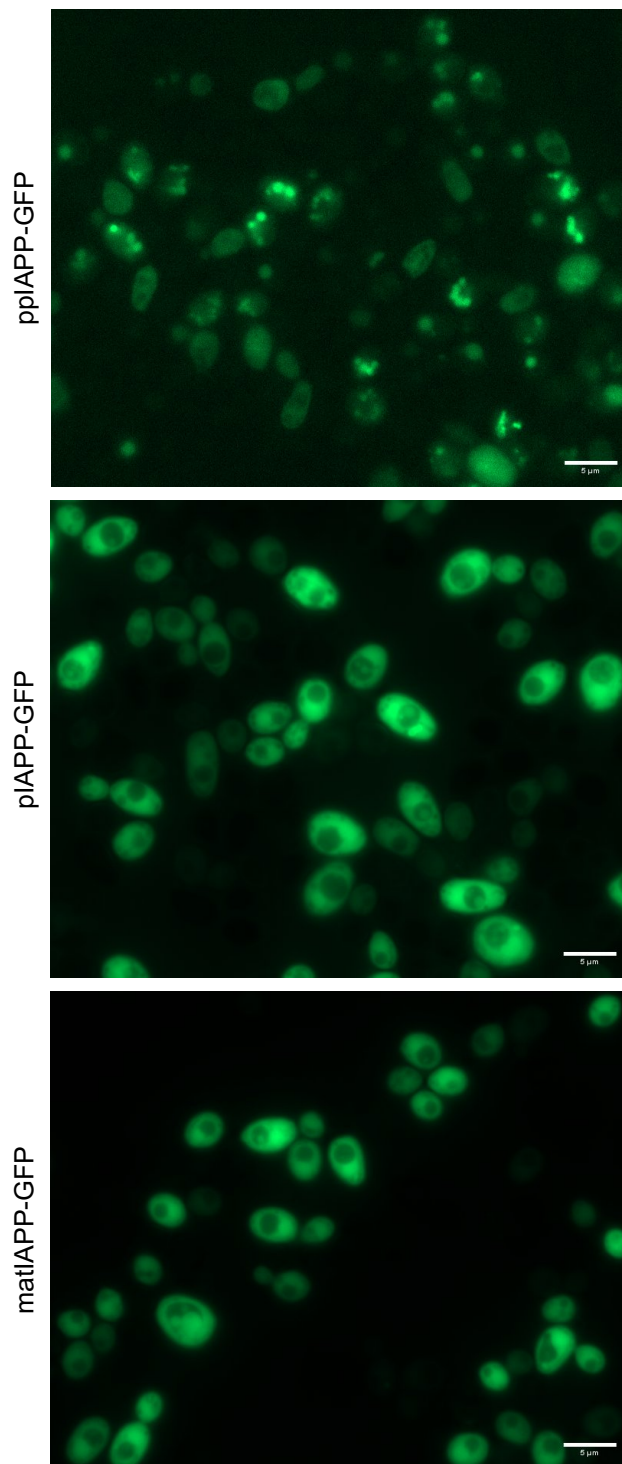

**Figure S4:** BY4741 cells expressing IAPP-GFP fusions were induced with galactose for 12 h and the number of fluorescent cells as well as the number of cells containing aggregates was monitored by fluorescence microscopy. Scale bars correspond to 5  $\mu\text{m}$ .

**Figure S5**

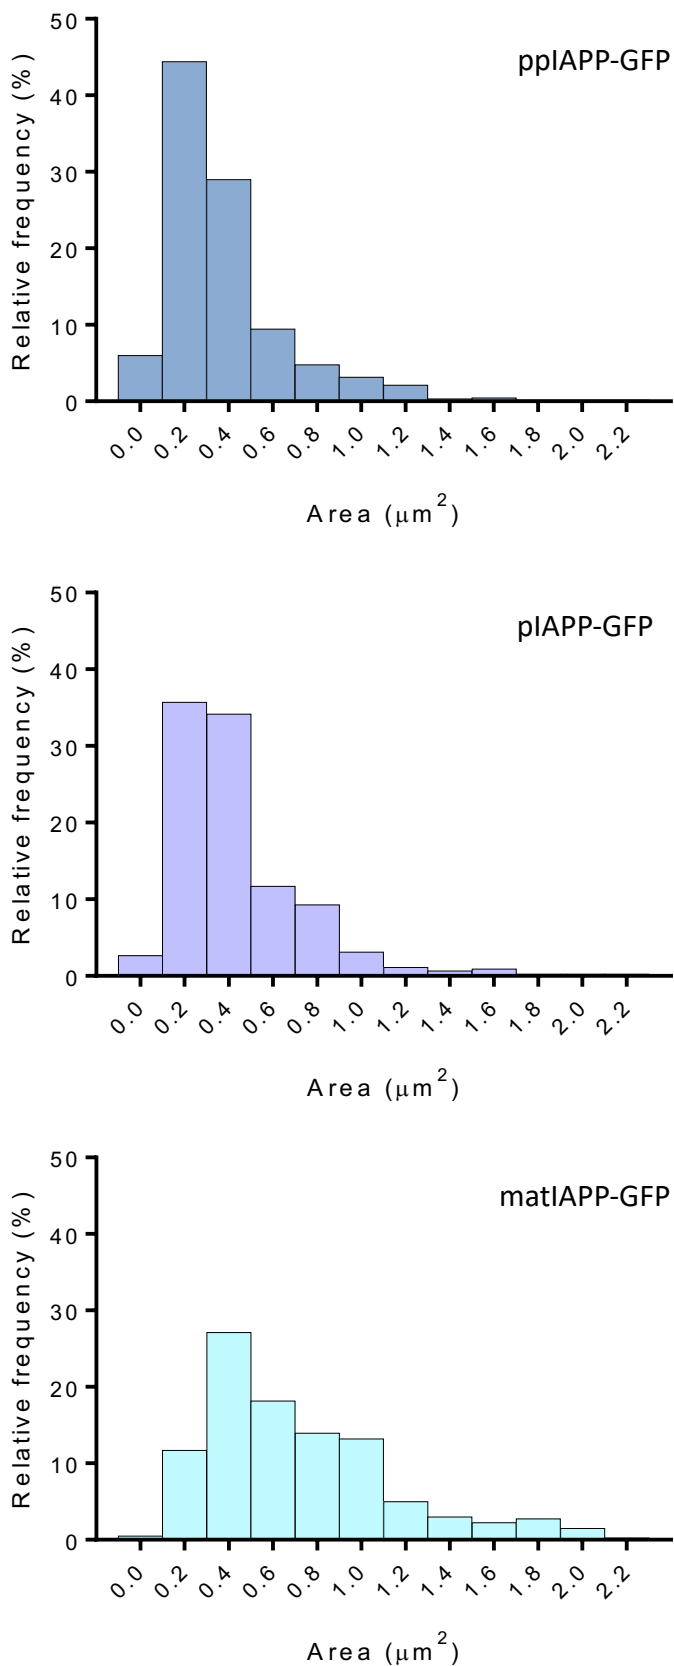

**Figure S5:** Frequency distribution of the aggregates areas for each of the strains. BY4741 cells expressing matIAPP-GFP fusions were induced with galactose for 12 h and the aggregates area was measured using ImageJ.

# Figure S6

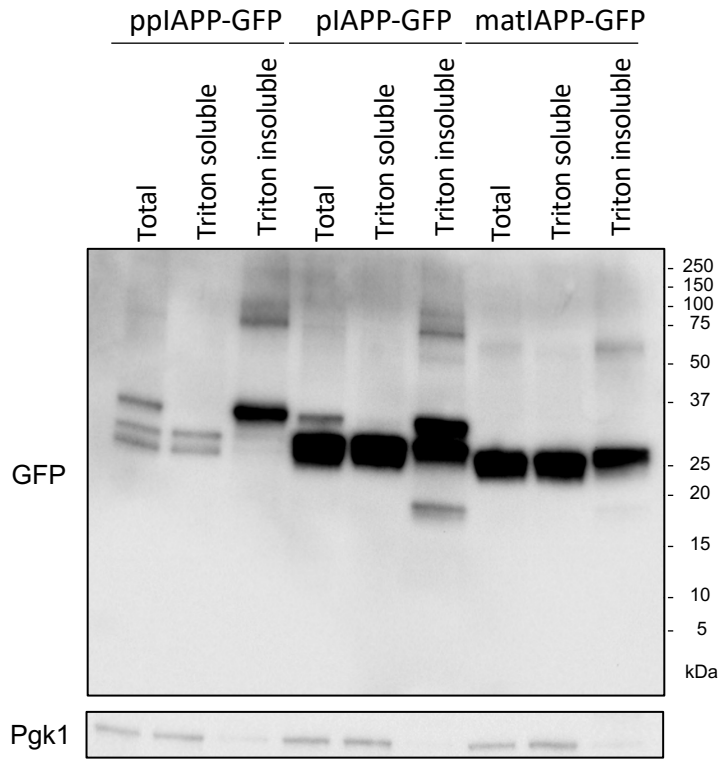

**Figure S6:** BY4741 cells expressing IAPP-GFP fusions were induced with galactose for 12 h and proteins separated according to their solubility in Triton. Signals were obtained by immunoblotting using anti-GFP antibody. Pgk1 was used as loading control.



# Figure S7

**A**

| Protein     | Intrinsic solubility score based on the sequence |
|-------------|--------------------------------------------------|
| ppIAPP-GFP  | 0.037126                                         |
| pIAPP-GFP   | 0.672321                                         |
| matIAPP-GFP | 0.589208                                         |

**B**

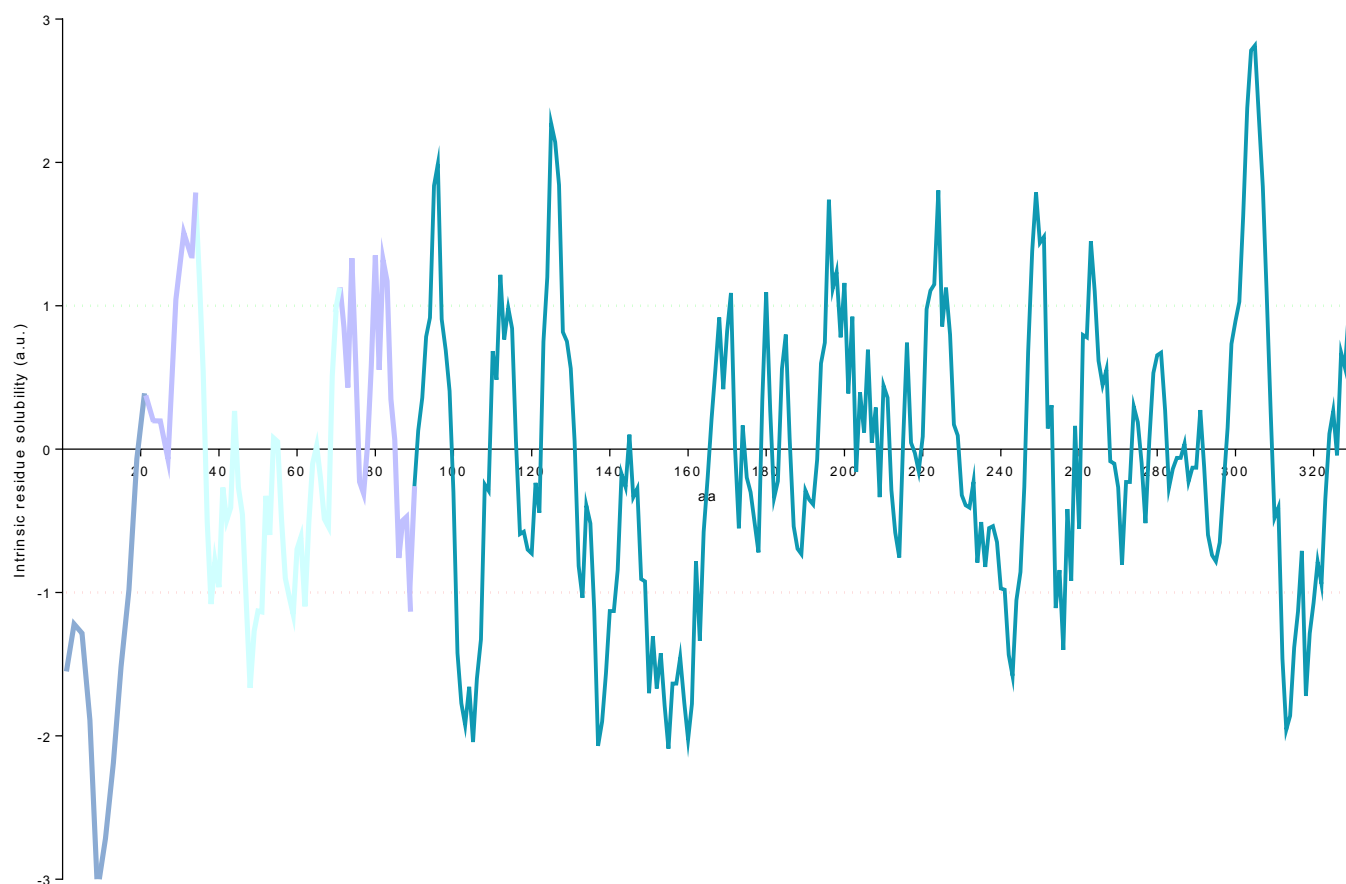

**Figure S7:** Computational prediction of the solubility of the differently processed IAPP forms by the *CamSol Intrinsic* algorithm. **(A)** Intrinsic solubility scores calculated based on the contribution of each amino acid solubility in the protein sequence. **(B)** Scores higher than 1 indicate highly soluble regions, while scores smaller than -1 suggest poorly soluble ones.

## Figure S8

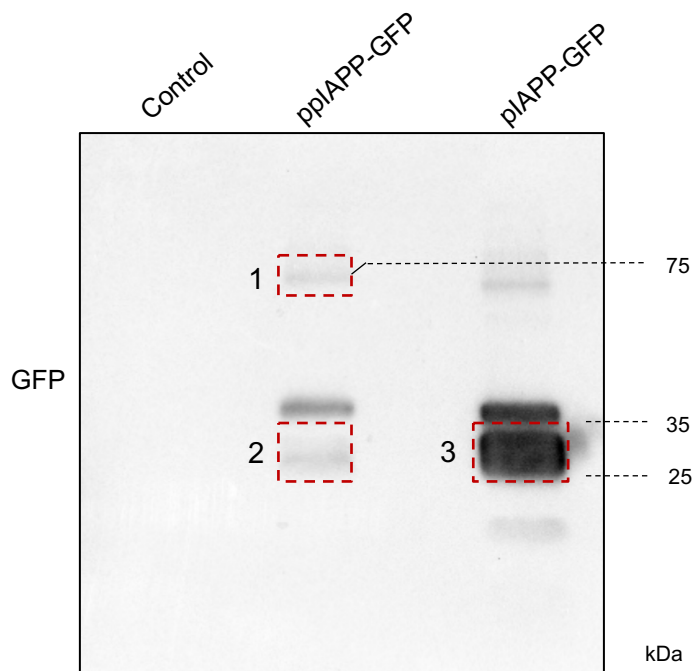

**Figure S8:** BY4741 cells expressing the indicated IAPP-GFP fusions and the control construct were induced with galactose for 12 h and total proteins resolved in Mini-Protein TGX Gels in duplicates. One gel was processed for immunoblotting (using anti-GFP antibody) and the corresponding signals were excised from the duplicate gel previously stained with InstantBlue™.
